# Supplementary material for: Efficient multiphoton upconversion and synthesis route dependent emission tunability in GdPO4:Ho3+, Yb3+ nanocrystals
Source: Royal Society of Chemistry journal article supplement (doi:10.1039/c4ra04795h), 2014-01-01

Supplementary information

## Efficient multiphoton upconversion and synthesis route dependent emission tunability in $\text{GdPO}_4:\text{Ho}^{3+}, \text{Yb}^{3+}$ nanocrystals

Vineet Kumar, Poonam Rani, Dinesh Singh, Santa Chawla\*

CSIR-National Physical Laboratory, Dr. K.S. Krishnan Road, New Delhi -110012, India

TEM pictures of all samples

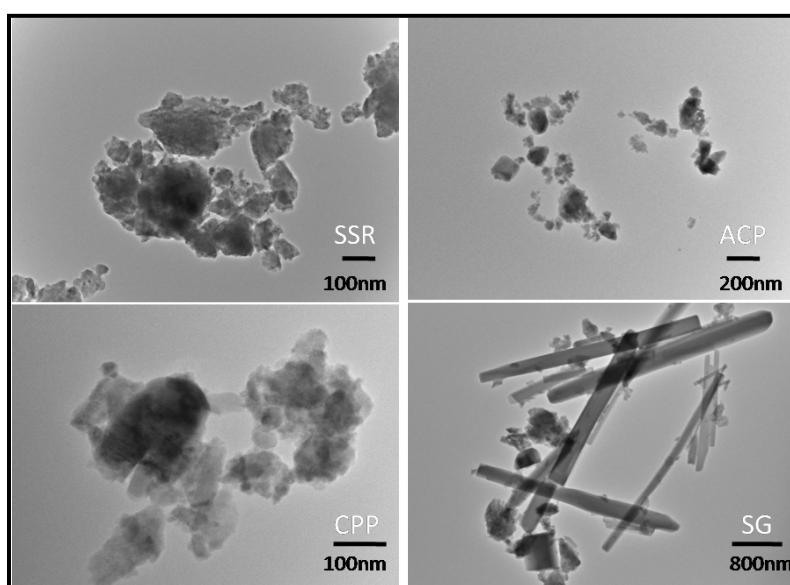

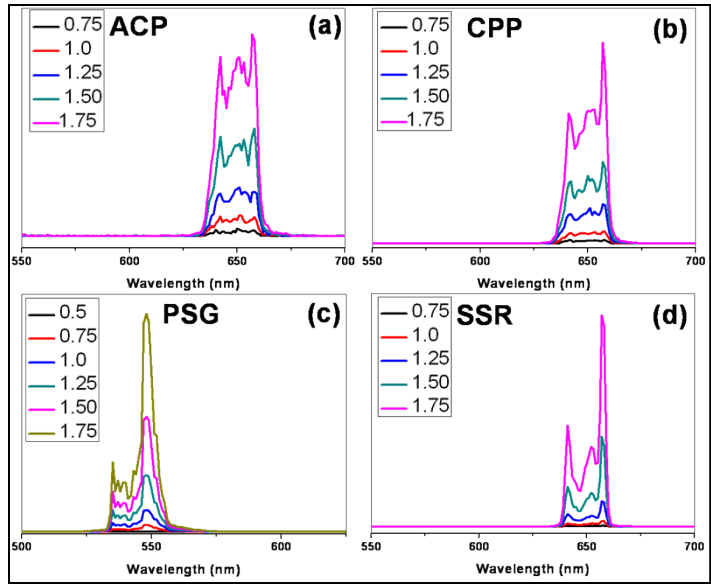

Supplement: c4ra04795h1.pdf [file c4ra04795h1.pdf]
